# Supplementary material for: Decomposing the Effective Radiative Forcing of anthropogenic aerosols based on CMIP6 Earth System Models
Source: Copernicus journal article supplement (doi:10.5194/egusphere-2023-2571), 2023-11-21
Supplement: Supplementary file 1 [file egusphere-2023-2571-supplement.pdf]

# Decomposing the Effective Radiative Forcing of anthropogenic aerosols based on CMIP6 Earth System Models

Alkiviadis Kalisoras<sup>1\*</sup>, Aristeidis K. Georgoulas<sup>1</sup>, Dimitris Akritidis<sup>1,2</sup>, Robert J. Allen<sup>3</sup>, Vaishali Naik<sup>4</sup>, Chaincy Kuo<sup>5</sup>, Sophie Szopa<sup>6</sup>, Pierre Nabat<sup>7</sup>, Dirk Olivié<sup>8</sup>, Twan van Noije<sup>9</sup>, Philippe Le Sager<sup>9</sup>, David Neubauer<sup>10</sup>, Naga Oshima<sup>11</sup>, Jane Mulcahy<sup>12</sup>, Larry W. Horowitz<sup>4</sup>, Prodromos Zanis<sup>1</sup>

<sup>1</sup>Department of Meteorology and Climatology, School of Geology, Aristotle University of Thessaloniki, Thessaloniki, Greece

<sup>2</sup>Atmospheric Chemistry Department, Max Planck Institute for Chemistry, 55128 Mainz, Germany

<sup>3</sup>Department of Earth and Planetary Sciences, University of California Riverside, Riverside, CA, USA

<sup>4</sup>NOAA Geophysical Fluid Dynamics Laboratory, Princeton, NJ, USA

<sup>5</sup>Lawrence Berkeley National Laboratory, Berkeley, CA 94720, USA

<sup>6</sup>Laboratoire des Sciences du Climat et de l'Environnement, LSCE-IPSL (CEA-CNRS-UVSQ), Université Paris-Saclay, 91191 Gif-sur-Yvette, France

<sup>7</sup>CNRM, Université de Toulouse, Météo-France, CNRS, Toulouse, France

<sup>8</sup>Norwegian Meteorological Institute, Oslo, Norway

<sup>9</sup>Royal Netherlands Meteorological Institute (KNMI), De Bilt, the Netherlands

<sup>10</sup>Institute of Atmospheric and Climate Science, ETH Zurich, Zurich, Switzerland

<sup>11</sup>Meteorological Research Institute, Japan Meteorological Agency, Tsukuba, Japan

<sup>12</sup>Met Office Hadley Centre, Exeter, UK

**\*Correspondence to:** Alkiviadis Kalisoras ([kalisort@geo.auth.gr](mailto:kalisort@geo.auth.gr))

This is the electronic supplement of the article “Decomposing the Effective Radiative Forcing of anthropogenic aerosols based on CMIP6 Earth System Models”.

**Table S1.** AOD differences for the piClim experiments (piClim-aer, piClim-SO<sub>2</sub>, piClim-OC and piClim-BC), and the transient (histSST) experiment averaged over the 1995-2014 period. Global mean  $\Delta$ AOD values are presented for each ESM, along with the multi-model ensemble mean and the inter-model variability (one standard deviation; SD).

| Model             | piClim-aer | piClim-SO <sub>2</sub> | piClim-OC | piClim-BC | histSST (1995-2014) |          |         |         |
|-------------------|------------|------------------------|-----------|-----------|---------------------|----------|---------|---------|
|                   | od550aer   | od550aer               | od550aer  | od550aer  | od550aer            | od550so4 | od550oa | od550bc |
| CNRM-ESM2-1       | 0.0161     | 0.0119                 | 0.0028    | 0.0017    | 0.0166              | 0.0127   | 0.0027  | 0.0013  |
| EC-Earth3-AerChem | 0.0369     | -                      | -         | -         | 0.0380              | 0.0225   | 0.0129  | 0.0016  |
| GFDL-ESM4         | 0.0410     | 0.0173                 | 0.0054    | 0.0067    | 0.0411              | 0.0301   | 0.0049  | 0.0027  |
| MPI-ESM1-2-HAM    | 0.0257     | 0.0186                 | 0.0060    | 0.0043    | 0.0255              | -        | -       | -       |
| MRI-ESM2-0        | 0.0346     | 0.0272                 | 0.0037    | 0.0057    | -                   | -        | -       | -       |
| NorESM2-LM        | 0.0218     | 0.0139                 | 0.0050    | 0.0029    | 0.0239              | 0.0110   | 0.0089  | 0.0016  |
| UKESM1-0-LL       | 0.0329     | 0.0260                 | 0.0044    | 0.0029    | 0.0363              | -        | -       | -       |
| ENSEMBLE (Mean)   | 0.0299     | 0.0191                 | 0.0046    | 0.0040    | 0.0302              | 0.0191   | 0.0073  | 0.0018  |
| ENSEMBLE (SD)     | 0.0082     | 0.0057                 | 0.0011    | 0.0018    | 0.0088              | 0.0077   | 0.0039  | 0.0005  |

**Table S2.** Global mean SW ERF values for the piClim experiments (piClim-aer, piClim-SO<sub>2</sub>, piClim-OC and piClim-BC). ERF<sub>TOTAL</sub>, ERF<sub>ARI</sub>, ERF<sub>ACI</sub> and ERF<sub>ALB</sub> are presented for each ESM, along with the multi-model ensemble mean and the inter-model variability (one standard deviation; SD).

| Model             | piClim-aer |       |       |       | piClim-SO <sub>2</sub> |       |       |       | piClim-OC |       |       |       | piClim-BC |      |       |      |
|-------------------|------------|-------|-------|-------|------------------------|-------|-------|-------|-----------|-------|-------|-------|-----------|------|-------|------|
|                   | ERF        | ARI   | ACI   | ALB   | ERF                    | ARI   | ACI   | ALB   | ERF       | ARI   | ACI   | ALB   | ERF       | ARI  | ACI   | ALB  |
| CNRM-ESM2-1       | -0.82      | -0.22 | -0.59 | -0.01 | -0.84                  | -0.29 | -0.55 | 0.01  | -0.23     | -0.07 | -0.18 | 0.02  | 0.15      | 0.13 | -0.01 | 0.02 |
| EC-Earth3-AerChem | -1.36      | 0.08  | -1.36 | -0.08 | -                      | -     | -     | -     | -         | -     | -     | -     | -         | -    | -     | -    |
| GFDL-ESM4         | -0.59      | 0.24  | -0.77 | -0.06 | -0.76                  | -0.22 | -0.51 | -0.02 | -0.21     | -0.09 | -0.13 | 0.01  | 0.62      | 0.51 | 0.08  | 0.03 |
| MPI-ESM-1-2-HAM   | -1.53      | 0.19  | -1.67 | -0.05 | -1.35                  | -0.20 | -1.10 | -0.05 | -0.85     | -0.04 | -0.80 | 0.00  | 0.04      | 0.71 | -0.71 | 0.04 |
| MRI-ESM2-0        | -2.76      | -0.32 | -2.49 | 0.05  | -1.92                  | -0.49 | -1.38 | -0.05 | -0.52     | -0.07 | -0.43 | -0.02 | -1.22     | 0.26 | -1.63 | 0.15 |
| NorESM2-LM        | -1.63      | 0.00  | -1.55 | -0.08 | -1.80                  | -0.22 | -1.40 | -0.18 | -0.35     | -0.08 | -0.27 | 0.00  | 0.46      | 0.32 | 0.02  | 0.12 |
| UKESM1-0-LL       | -1.26      | -0.20 | -1.00 | -0.06 | -1.68                  | -0.53 | -1.08 | -0.07 | -0.25     | -0.16 | -0.07 | -0.03 | 0.51      | 0.36 | 0.15  | 0.00 |
| ENSEMBLE (Mean)   | -1.42      | -0.03 | -1.35 | -0.04 | -1.39                  | -0.33 | -1.01 | -0.06 | -0.40     | -0.09 | -0.31 | 0.00  | 0.09      | 0.38 | -0.35 | 0.06 |
| ENSEMBLE (SD)     | 0.65       | 0.20  | 0.59  | 0.04  | 0.45                   | 0.13  | 0.36  | 0.06  | 0.22      | 0.04  | 0.25  | 0.01  | 0.62      | 0.19 | 0.64  | 0.06 |

**Table S3.** As in Table S1, but for the global mean LW ERF values.

| Model             | piClim-aer |       |       |      | piClim-SO <sub>2</sub> |       |      |      | piClim-OC |      |       |       | piClim-BC |      |       |       |
|-------------------|------------|-------|-------|------|------------------------|-------|------|------|-----------|------|-------|-------|-----------|------|-------|-------|
|                   | ERF        | ARI   | ACI   | ALB  | ERF                    | ARI   | ACI  | ALB  | ERF       | ARI  | ACI   | ALB   | ERF       | ARI  | ACI   | ALB   |
| CNRM-ESM2-1       | 0.08       | 0.00  | -0.02 | 0.09 | 0.10                   | 0.00  | 0.02 | 0.07 | 0.06      | 0.00 | 0.04  | 0.03  | -0.03     | 0.00 | -0.02 | -0.01 |
| EC-Earth3-AerChem | 0.01       | 0.03  | -0.17 | 0.15 | -                      | -     | -    | -    | -         | -    | -     | -     | -         | -    | -     | -     |
| GFDL-ESM4         | -0.11      | 0.02  | -0.15 | 0.02 | 0.08                   | 0.01  | 0.00 | 0.08 | 0.00      | 0.00 | -0.04 | 0.04  | -0.27     | 0.01 | -0.18 | -0.11 |
| MPI-ESM-1-2-HAM   | 0.27       | -0.03 | 0.10  | 0.19 | 0.28                   | -0.04 | 0.14 | 0.19 | 0.06      | 0.02 | 0.02  | 0.02  | -0.19     | 0.01 | -0.16 | -0.04 |
| MRI-ESM2-0        | 1.52       | 0.00  | 1.49  | 0.03 | 0.52                   | 0.00  | 0.42 | 0.09 | 0.18      | 0.00 | 0.21  | -0.03 | 1.45      | 0.00 | 1.54  | -0.08 |
| NorESM2-LM        | 0.22       | 0.04  | 0.17  | 0.02 | 0.35                   | 0.03  | 0.29 | 0.03 | -0.02     | 0.00 | 0.00  | -0.03 | -0.22     | 0.00 | -0.13 | -0.10 |
| UKESM1-0-LL       | 0.16       | 0.05  | 0.01  | 0.11 | 0.32                   | 0.04  | 0.18 | 0.10 | 0.04      | 0.00 | 0.01  | 0.03  | -0.15     | 0.01 | -0.16 | 0.01  |
| ENSEMBLE (Mean)   | 0.31       | 0.02  | 0.21  | 0.09 | 0.28                   | 0.01  | 0.18 | 0.09 | 0.05      | 0.00 | 0.04  | 0.01  | 0.10      | 0.00 | 0.15  | -0.06 |
| ENSEMBLE (SD)     | 0.51       | 0.02  | 0.54  | 0.06 | 0.15                   | 0.03  | 0.15 | 0.05 | 0.07      | 0.01 | 0.08  | 0.03  | 0.61      | 0.01 | 0.62  | 0.04  |

**Table S4.** Global mean SW and LW ERF values for the transient (histSST) experiment averaged over the 1995-2014 period.  $ERF_{TOTAL}$ ,  $ERF_{ARI}$ ,  $ERF_{ACI}$  and  $ERF_{ALB}$  are presented for each ESM, along with the multi-model ensemble mean and the inter-model variability (one standard deviation; SD).

| Model             | SW    |       |       |       | LW    |       |       |      |
|-------------------|-------|-------|-------|-------|-------|-------|-------|------|
|                   | ERF   | ARI   | ACI   | ALB   | ERF   | ARI   | ACI   | ALB  |
| CNRM-ESM2-1       | -0.85 | -0.26 | -0.53 | -0.05 | -0.01 | 0.00  | -0.06 | 0.04 |
| EC-Earth3-AerChem | -1.85 | -0.01 | -1.78 | -0.06 | 0.15  | 0.03  | -0.08 | 0.20 |
| GFDL-ESM4         | -0.80 | 0.05  | -0.79 | -0.06 | 0.01  | 0.02  | -0.08 | 0.08 |
| MPI-ESM-1-2-HAM   | -1.60 | 0.10  | -1.64 | -0.05 | 0.27  | -0.02 | 0.13  | 0.16 |
| NorESM2-LM        | -2.03 | -0.09 | -1.76 | -0.17 | 0.28  | 0.04  | 0.17  | 0.08 |
| UKESM1-0-LL       | -1.52 | -0.31 | -1.12 | -0.09 | 0.24  | 0.04  | 0.03  | 0.17 |
| ENSEMBLE (Mean)   | -1.43 | -0.10 | -1.25 | -0.08 | 0.15  | 0.02  | 0.01  | 0.12 |
| ENSEMBLE (SD)     | 0.47  | 0.15  | 0.49  | 0.04  | 0.12  | 0.02  | 0.10  | 0.06 |

**Table S5.** Mean AOD changes for histSST experiment averaged over 1965-1984 and 1995-2014. Variables od550aer, od550so4, od550oa, and od550bc denote the differences in all-aerosol, sulphate, organic aerosol, and black carbon AOD, respectively. Global and regional AOD changes for the five NH regions of interest (see main text) are presented for each model and their ensemble.

| Model             | Region | 1965-1984 |          |         |         | 1995-2014 |          |         |         |
|-------------------|--------|-----------|----------|---------|---------|-----------|----------|---------|---------|
|                   |        | od550aer  | od550so4 | od550oa | od550bc | od550aer  | od550so4 | od550oa | od550bc |
| CNRM-ESM2-1       | ENA    | 0.0916    | 0.0935   | -0.0029 | 0.0014  | 0.0520    | 0.0543   | -0.0042 | 0.0009  |
|                   | WCE    | 0.1079    | 0.1014   | 0.0028  | 0.0042  | 0.0369    | 0.0351   | -0.0009 | 0.0018  |
|                   | MED    | 0.0580    | 0.0526   | 0.0019  | 0.0018  | 0.0369    | 0.0329   | 0.0025  | 0.0022  |
|                   | EAS    | 0.0639    | 0.0511   | 0.0072  | 0.0053  | 0.1547    | 0.1212   | 0.0211  | 0.0127  |
|                   | SAS    | 0.0415    | 0.0278   | 0.0085  | 0.0046  | 0.1190    | 0.0896   | 0.0219  | 0.0108  |
|                   | GLOBAL | 0.0132    | 0.0117   | 0.0011  | 0.0007  | 0.0166    | 0.0127   | 0.0027  | 0.0013  |
| EC-Earth3-AerChem | ENA    | 0.1370    | 0.1084   | 0.0187  | 0.0022  | 0.0905    | 0.0644   | 0.0150  | 0.0018  |
|                   | WCE    | 0.1665    | 0.1218   | 0.0176  | 0.0045  | 0.0749    | 0.0482   | 0.0091  | 0.0022  |
|                   | MED    | 0.0975    | 0.0754   | 0.0099  | 0.0022  | 0.0607    | 0.0455   | 0.0109  | 0.0024  |
|                   | EAS    | 0.1216    | 0.0604   | 0.0290  | 0.0051  | 0.2866    | 0.1579   | 0.0724  | 0.0133  |
|                   | SAS    | 0.0746    | 0.0399   | 0.0267  | 0.0037  | 0.2098    | 0.1198   | 0.0714  | 0.0101  |
|                   | GLOBAL | 0.0290    | 0.0192   | 0.0068  | 0.0009  | 0.0380    | 0.0225   | 0.0129  | 0.0016  |
| GFDL-ESM4         | ENA    | 0.1134    | 0.1103   | -0.0036 | 0.0030  | 0.0855    | 0.0753   | -0.0044 | 0.0026  |
|                   | WCE    | 0.3129    | 0.2967   | 0.0041  | 0.0077  | 0.1157    | 0.0964   | -0.0009 | 0.0038  |
|                   | MED    | 0.0916    | 0.0906   | 0.0025  | 0.0033  | 0.0648    | 0.0579   | 0.0036  | 0.0038  |
|                   | EAS    | 0.1323    | 0.1022   | 0.0103  | 0.0090  | 0.3343    | 0.2543   | 0.0305  | 0.0220  |
|                   | SAS    | 0.0596    | 0.0423   | 0.0119  | 0.0057  | 0.2433    | 0.1439   | 0.0318  | 0.0135  |
|                   | GLOBAL | 0.0290    | 0.0269   | 0.0019  | 0.0015  | 0.0411    | 0.0301   | 0.0049  | 0.0027  |
| MPI-ESM1-2-HAM    | ENA    | 0.2016    |          |         |         | 0.0908    |          |         |         |
|                   | WCE    | 0.4352    |          |         |         | 0.1107    |          |         |         |
|                   | MED    | 0.1309    |          |         |         | 0.0768    |          |         |         |
|                   | EAS    | 0.1502    |          | -       |         | 0.3783    |          | -       |         |
|                   | SAS    | 0.0416    |          |         |         | 0.1304    |          |         |         |
|                   | GLOBAL | 0.0244    |          |         |         | 0.0255    |          |         |         |
| NorESM2-LM        | ENA    | 0.0707    | 0.0545   | 0.0115  | 0.0021  | 0.0380    | 0.0298   | 0.0052  | 0.0017  |
|                   | WCE    | 0.1031    | 0.0714   | 0.0194  | 0.0041  | 0.0377    | 0.0240   | 0.0072  | 0.0021  |
|                   | MED    | 0.0688    | 0.0416   | 0.0083  | 0.0023  | 0.0404    | 0.0239   | 0.0069  | 0.0028  |
|                   | EAS    | 0.0600    | 0.0303   | 0.0209  | 0.0054  | 0.1593    | 0.0786   | 0.0638  | 0.0133  |
|                   | SAS    | 0.0383    | 0.0216   | 0.0147  | 0.0039  | 0.1169    | 0.0618   | 0.0469  | 0.0098  |
|                   | GLOBAL | 0.0166    | 0.0097   | 0.0045  | 0.0009  | 0.0239    | 0.0110   | 0.0089  | 0.0016  |
| UKESM1-0-LL       | ENA    | 0.1422    |          |         |         | 0.0805    |          |         |         |
|                   | WCE    | 0.2273    |          |         |         | 0.0751    |          |         |         |
|                   | MED    | 0.1198    |          |         |         | 0.0786    |          |         |         |
|                   | EAS    | 0.0925    |          | -       |         | 0.2319    |          | -       |         |
|                   | SAS    | 0.0497    |          |         |         | 0.1972    |          |         |         |
|                   | GLOBAL | 0.0300    |          |         |         | 0.0363    |          |         |         |
| ENSEMBLE          | ENA    | 0.1261    | 0.0917   | 0.0059  | 0.0022  | 0.0729    | 0.0560   | 0.0029  | 0.0017  |
|                   | WCE    | 0.2255    | 0.1478   | 0.0110  | 0.0051  | 0.0752    | 0.0509   | 0.0036  | 0.0025  |
|                   | MED    | 0.0944    | 0.0650   | 0.0057  | 0.0024  | 0.0597    | 0.0400   | 0.0060  | 0.0028  |
|                   | EAS    | 0.1034    | 0.0610   | 0.0169  | 0.0062  | 0.2575    | 0.1530   | 0.0469  | 0.0153  |
|                   | SAS    | 0.0509    | 0.0329   | 0.0154  | 0.0045  | 0.1694    | 0.1038   | 0.0430  | 0.0111  |
|                   | GLOBAL | 0.0237    | 0.0169   | 0.0036  | 0.0010  | 0.0302    | 0.0191   | 0.0073  | 0.0018  |

**Table S6.** Global mean total ERF values for the transient (histSST) experiment averaged over the 2005-2014 period and the year 2014.  $ERF_{TOTAL}$ ,  $ERF_{ARI}$ ,  $ERF_{ACI}$  and  $ERF_{ALB}$  are presented for each ESM, along with the multi-model ensemble mean and the inter-model variability (one standard deviation; SD).

| Model             | 2005-2014 |       |       |       | 2014 (Jan-Dec) |       |       |       |
|-------------------|-----------|-------|-------|-------|----------------|-------|-------|-------|
|                   | ERF       | ARI   | ACI   | ALB   | ERF            | ARI   | ACI   | ALB   |
| CNRM-ESM2-1       | -0.92     | -0.25 | -0.59 | -0.07 | -1.12          | -0.26 | -0.72 | -0.15 |
| EC-Earth3-AerChem | -1.52     | 0.04  | -1.81 | 0.25  | -1.63          | 0.08  | -1.99 | 0.28  |
| GFDL-ESM4         | -0.69     | 0.10  | -0.82 | 0.03  | -0.47          | 0.11  | -0.78 | 0.20  |
| MPI-ESM-1-2-HAM   | -1.29     | 0.11  | -1.57 | 0.16  | 0.00           | 0.00  | 0.00  | 0.00  |
| NorESM2-LM        | -1.80     | -0.03 | -1.67 | -0.10 | -1.53          | 0.03  | -1.49 | -0.07 |
| UKESM1-0-LL       | -1.21     | -0.25 | -1.08 | 0.11  | -0.77          | -0.22 | -1.05 | 0.51  |
| ENSEMBLE (Mean)   | -1.23     | -0.06 | -1.22 | 0.06  | -1.10          | -0.05 | -1.21 | 0.16  |
| ENSEMBLE (SD)     | 0.36      | 0.15  | 0.45  | 0.12  | 0.44           | 0.16  | 0.48  | 0.24  |

# All Aerosols SW ERF (ENSEMBLE)

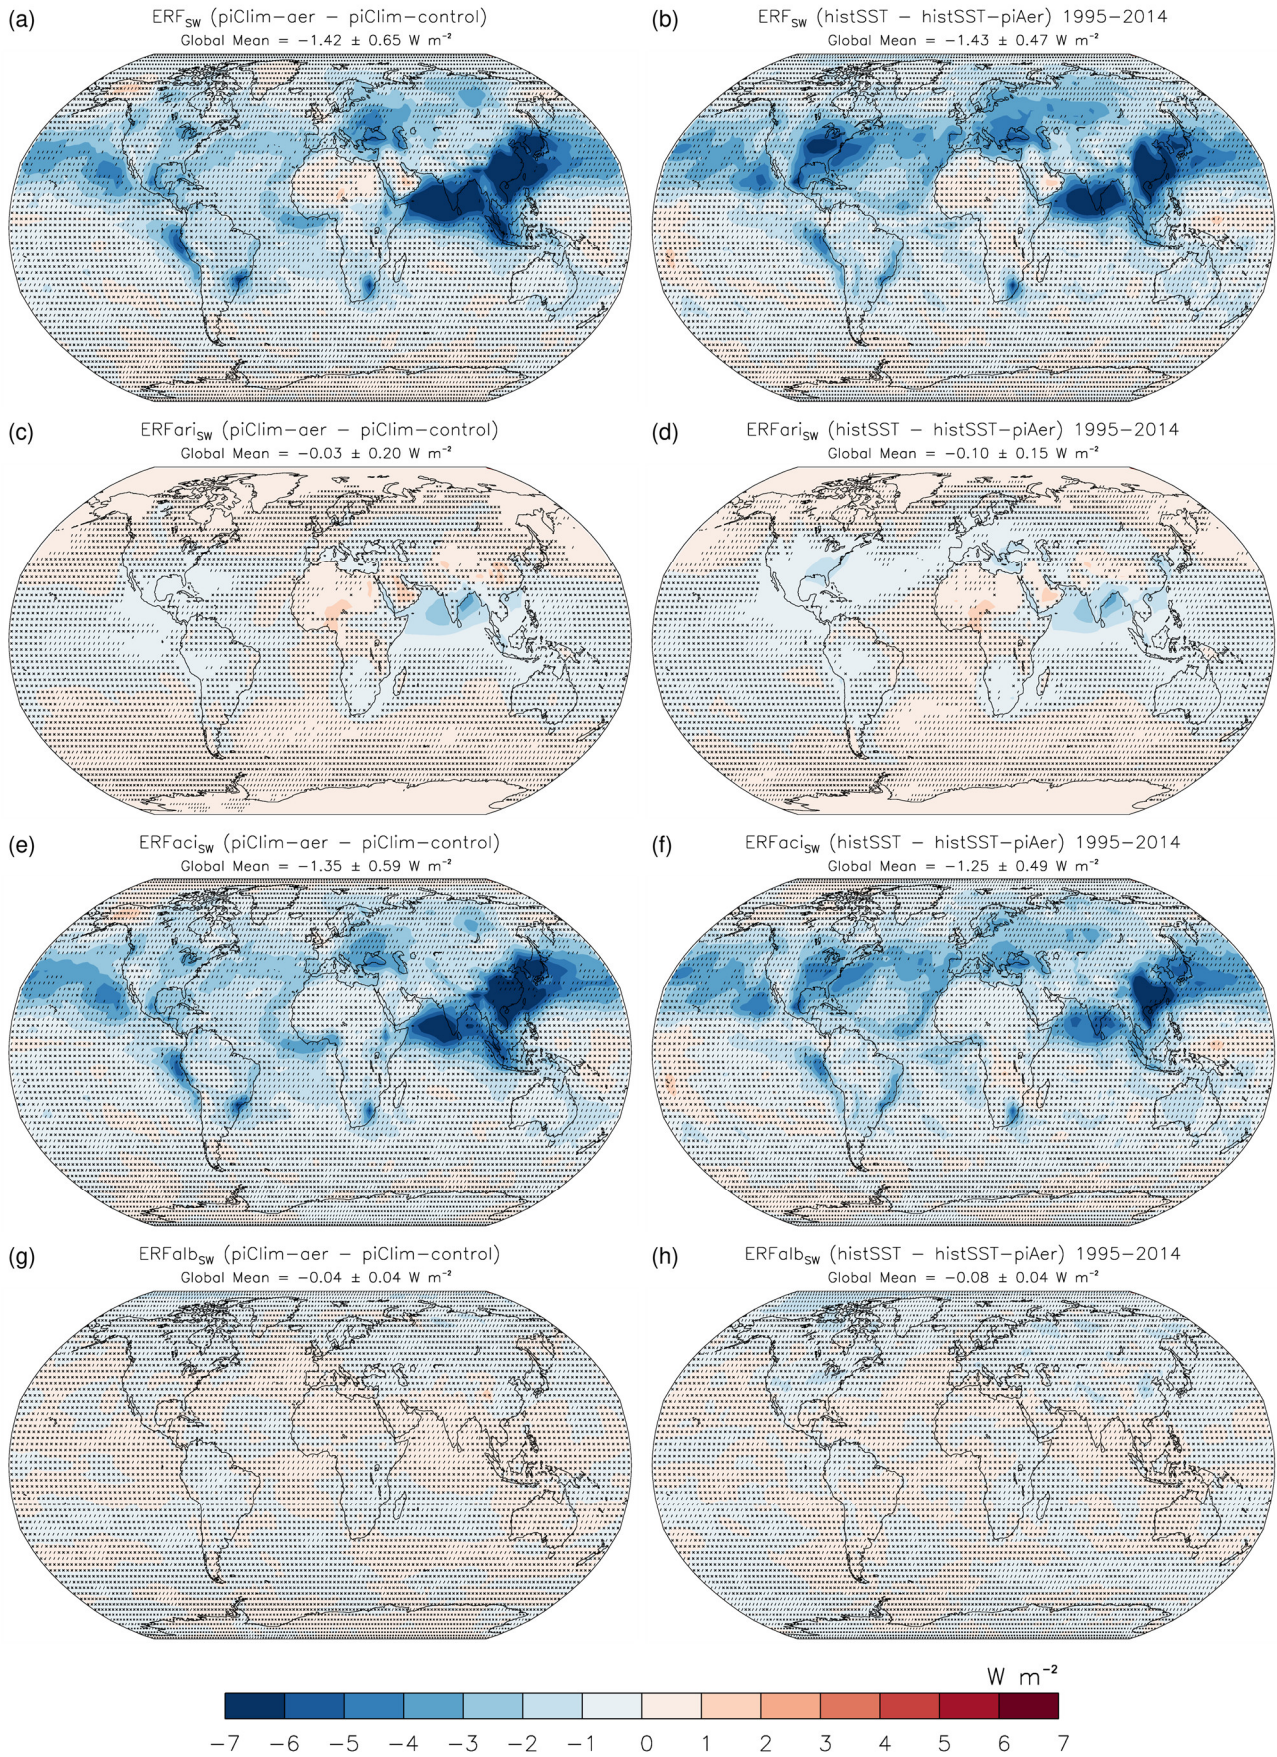

**Figure S1.** The SW ERF due to all anthropogenic aerosols relative to the pre-industrial era. The TOA spatial distribution is presented for the multi-model ensembles of piClim (left column) and histSST (averaged over 1995-2014; right column) experiments, respectively. The global mean SW ERF (1<sup>st</sup> row),  $ERF_{ARI}$  (2<sup>nd</sup> row),  $ERF_{ACI}$  (3<sup>rd</sup> row), and  $ERF_{ALB}$  (4<sup>th</sup> row) are shown along with the inter-model variability (one standard deviation). Colored areas devoid of markings indicate robust changes, while hatched (/) and cross-hatched (X) areas indicate non-robust changes and conflicting signals, respectively.

# All Aerosols LW ERF (ENSEMBLE)

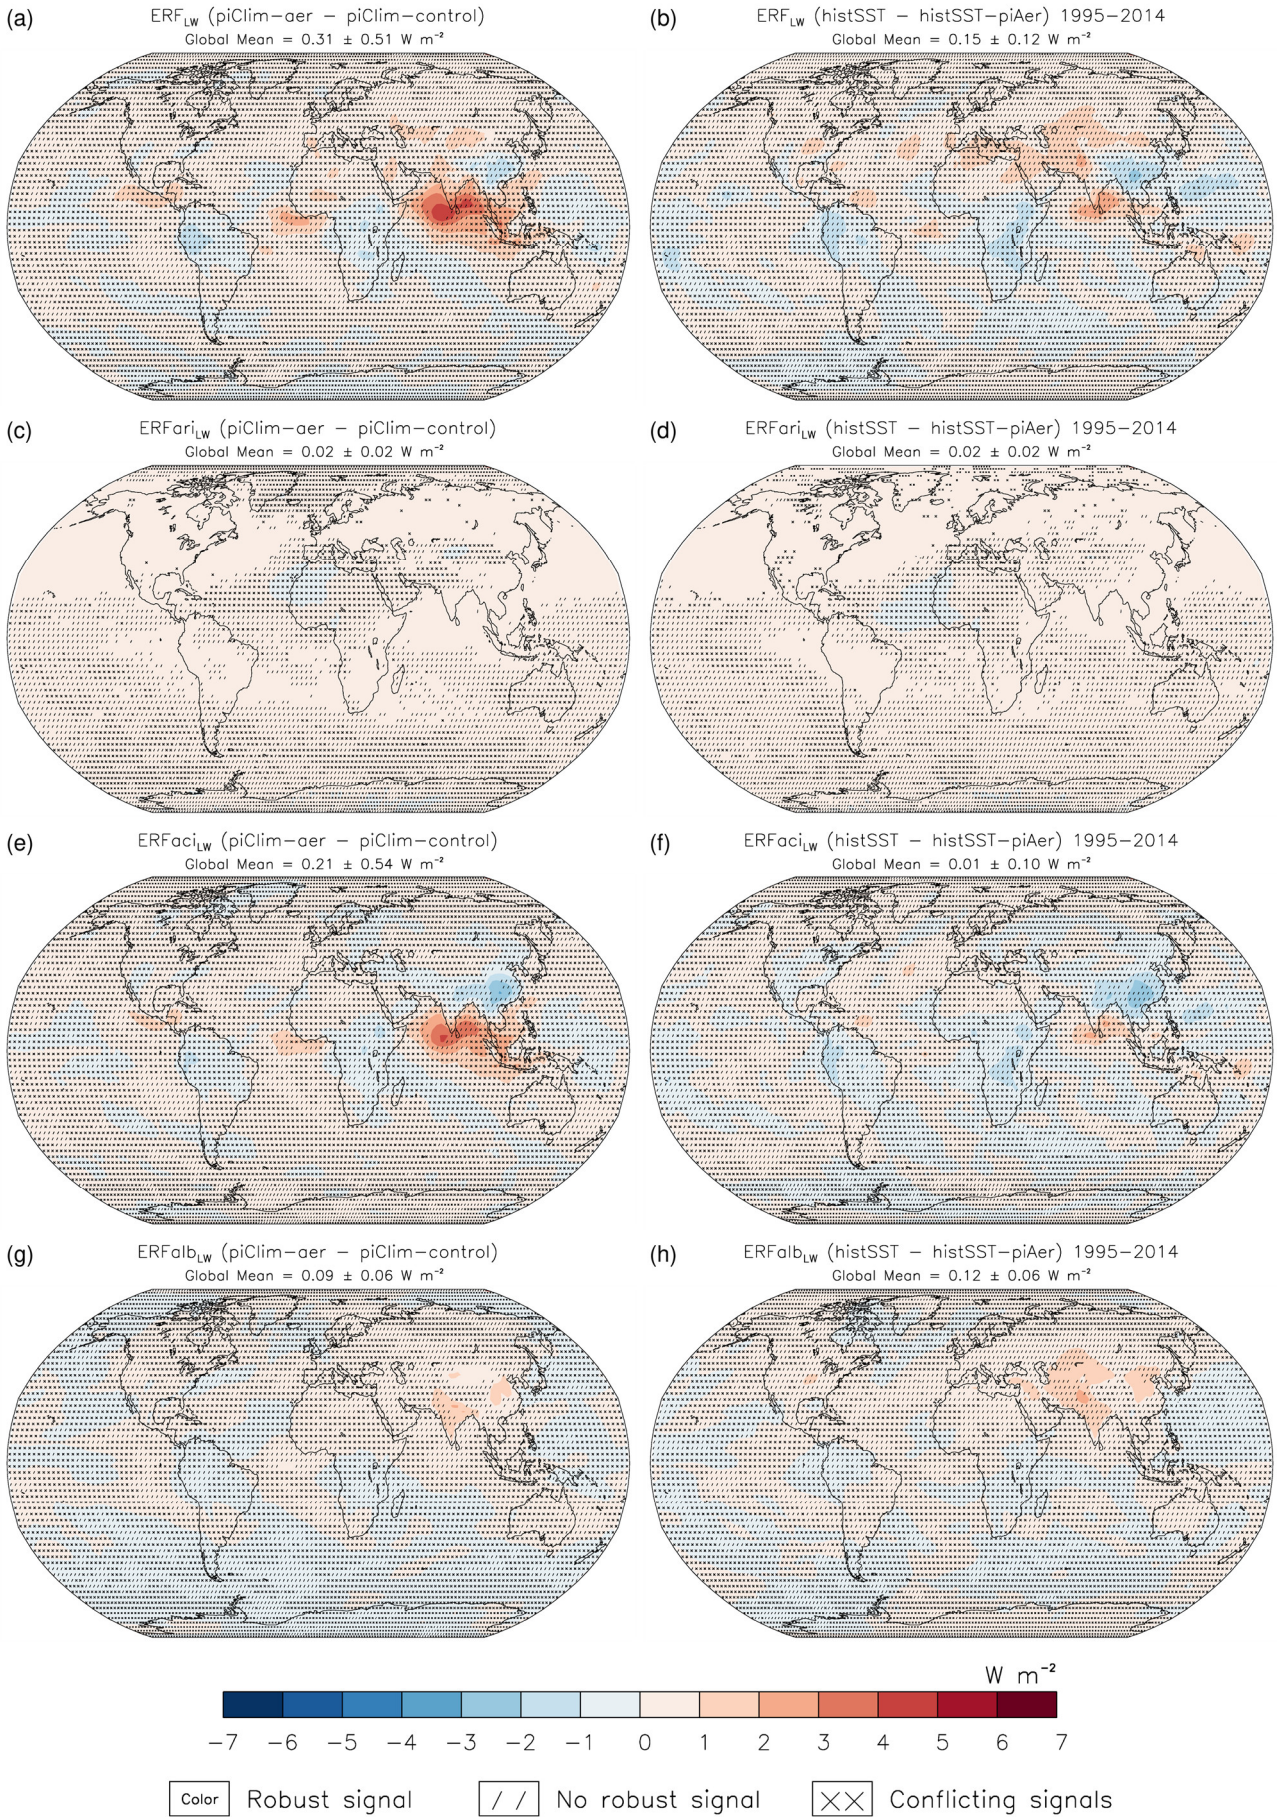

Figure S2. As in Figure S1, but for the LW.



### All Aerosols Total ERF (piClim-aer - piClim-control)

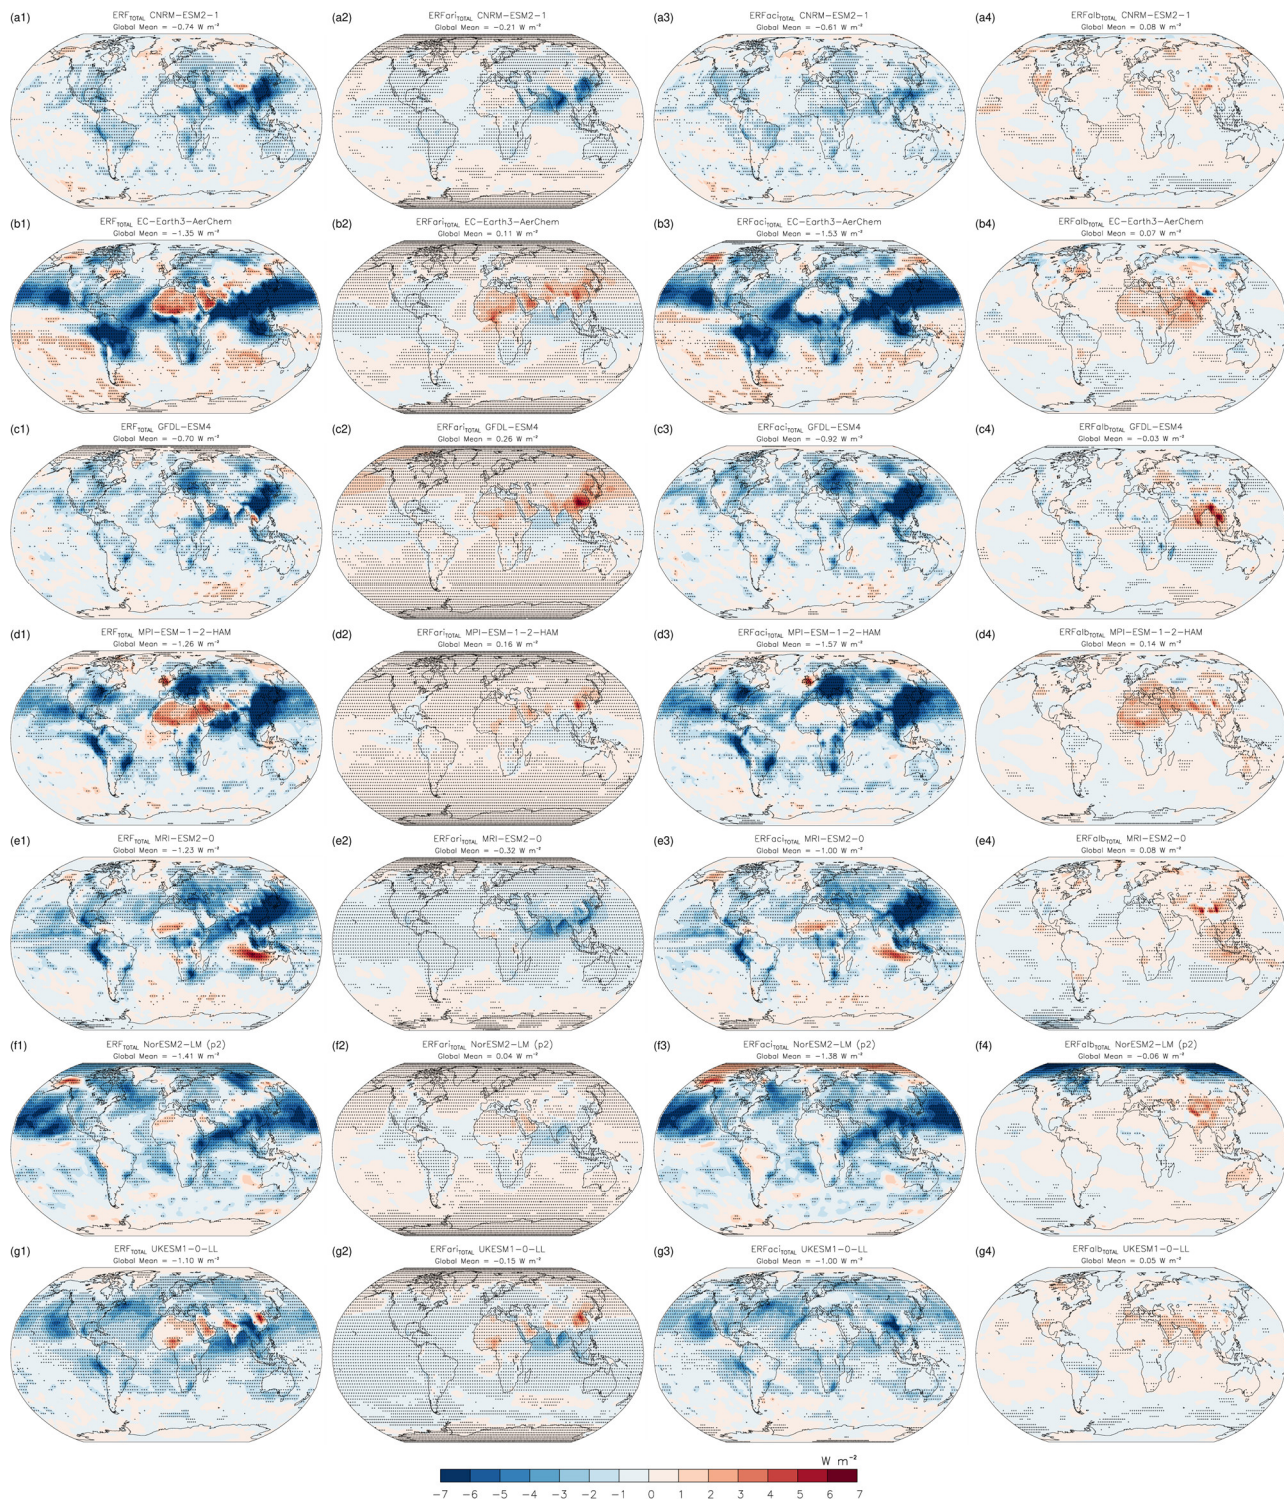

**Figure S3.** The total (SW+LW) ERF due to all anthropogenic aerosols relative to the pre-industrial era for each climate model. The TOA spatial distribution is presented only for the piClim-aer experiment. The global mean total ERF (1<sup>st</sup> column),  $ERF_{FAR}$  (2<sup>nd</sup> column),  $ERF_{ACI}$  (3<sup>rd</sup> column), and  $ERF_{ALB}$  (4<sup>th</sup> column) are shown. Black crosses indicate statistically significant results.

All Aerosols Total ERF (histSST - histSST-piAer) 1995-2014

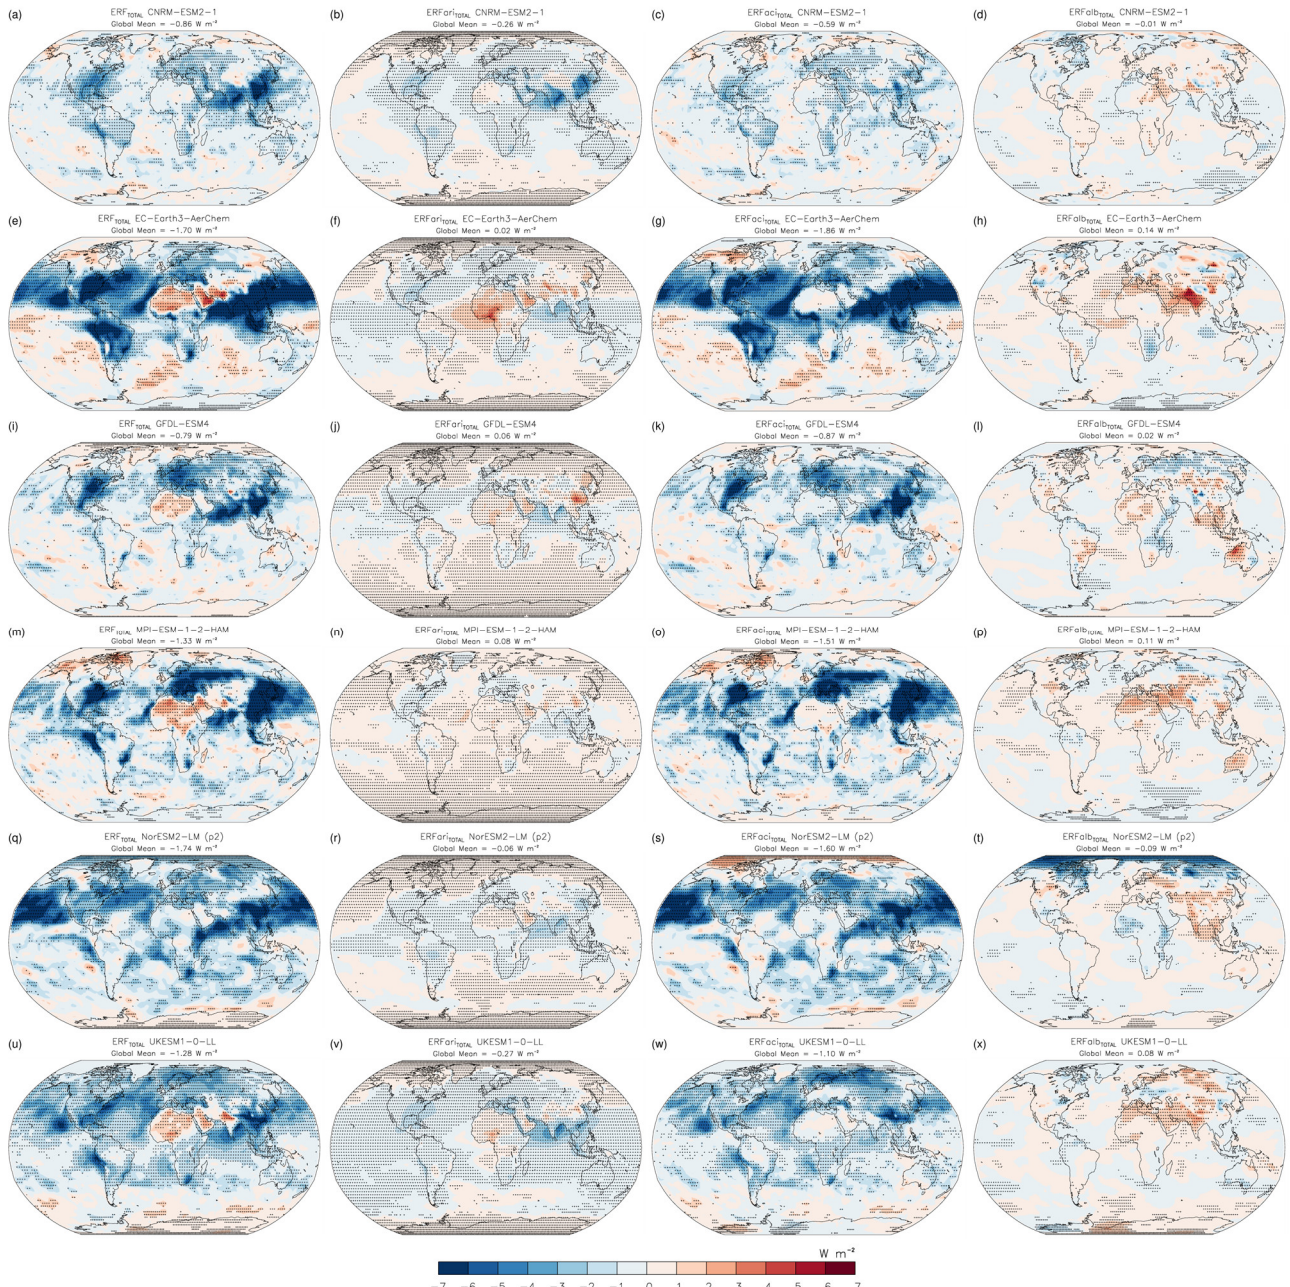

Figure S4. As in Fig. S3, but for the histSST experiment averaged over the 1995-2014 period.

## Anthropogenic Aerosols SW ERF (ENSEMBLE)

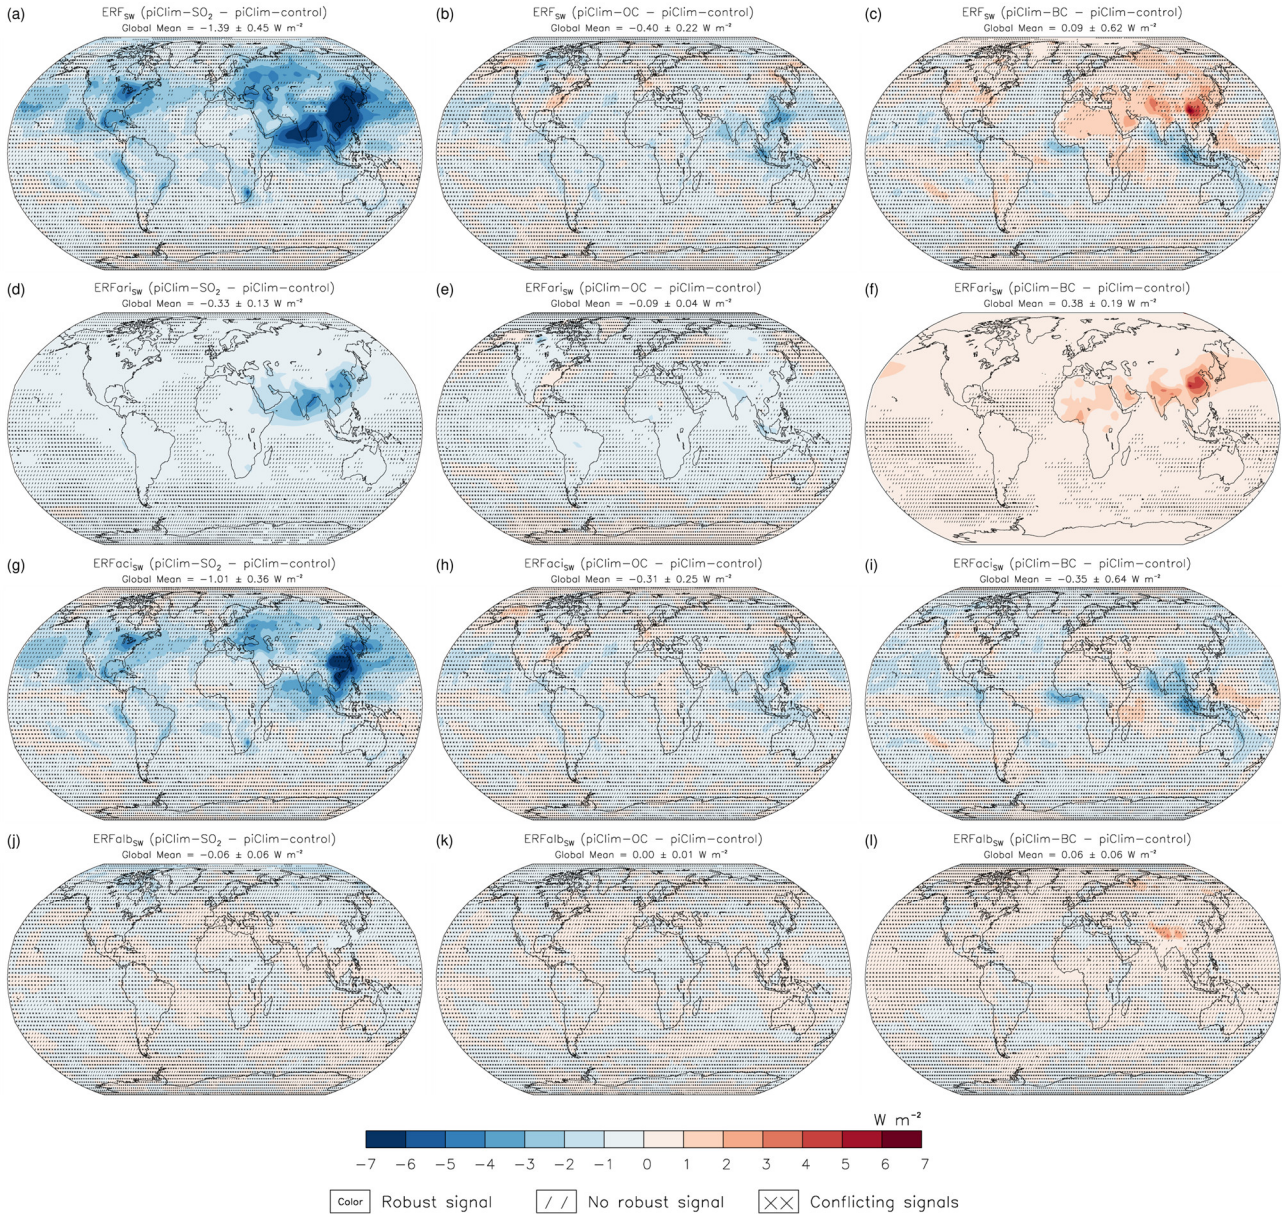

**Figure S5.** The SW ERF due to different anthropogenic aerosol subtype relative to the pre-industrial era. The TOA spatial distribution is presented for the multi-model ensembles piClim-SO<sub>2</sub> (left column), piClim-OC (middle column), and piClim-BC (right column) experiments, respectively. The global mean SW ERF (1<sup>st</sup> row), ERF<sub>ARI</sub> (2<sup>nd</sup> row), ERF<sub>ACI</sub> (3<sup>rd</sup> row), and ERF<sub>ALB</sub> (4<sup>th</sup> row) are shown along with the inter-model variability (one standard deviation). Colored areas devoid of markings indicate robust changes, while hatched (/) and cross-hatched (X) areas indicate non-robust changes and conflicting signals, respectively.

### Anthropogenic Aerosols LW ERF (ENSEMBLE)

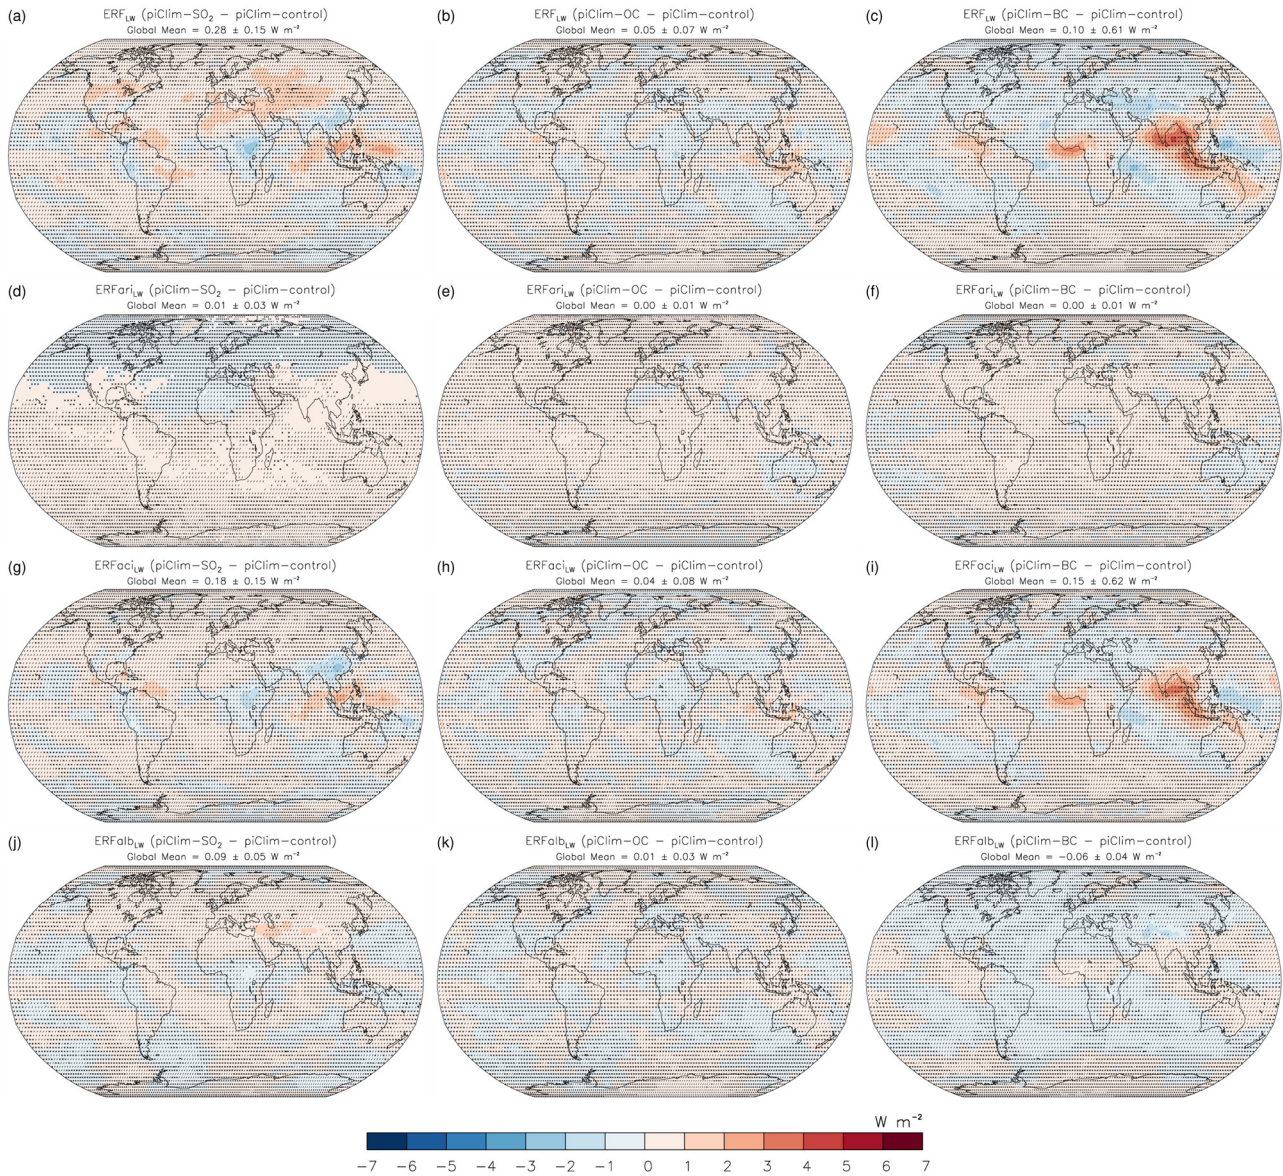

**Figure S6.** As in Figure S5, but for the LW ERFs.

### Sulphates Total ERF (piClim-SO<sub>2</sub> - piClim-control)

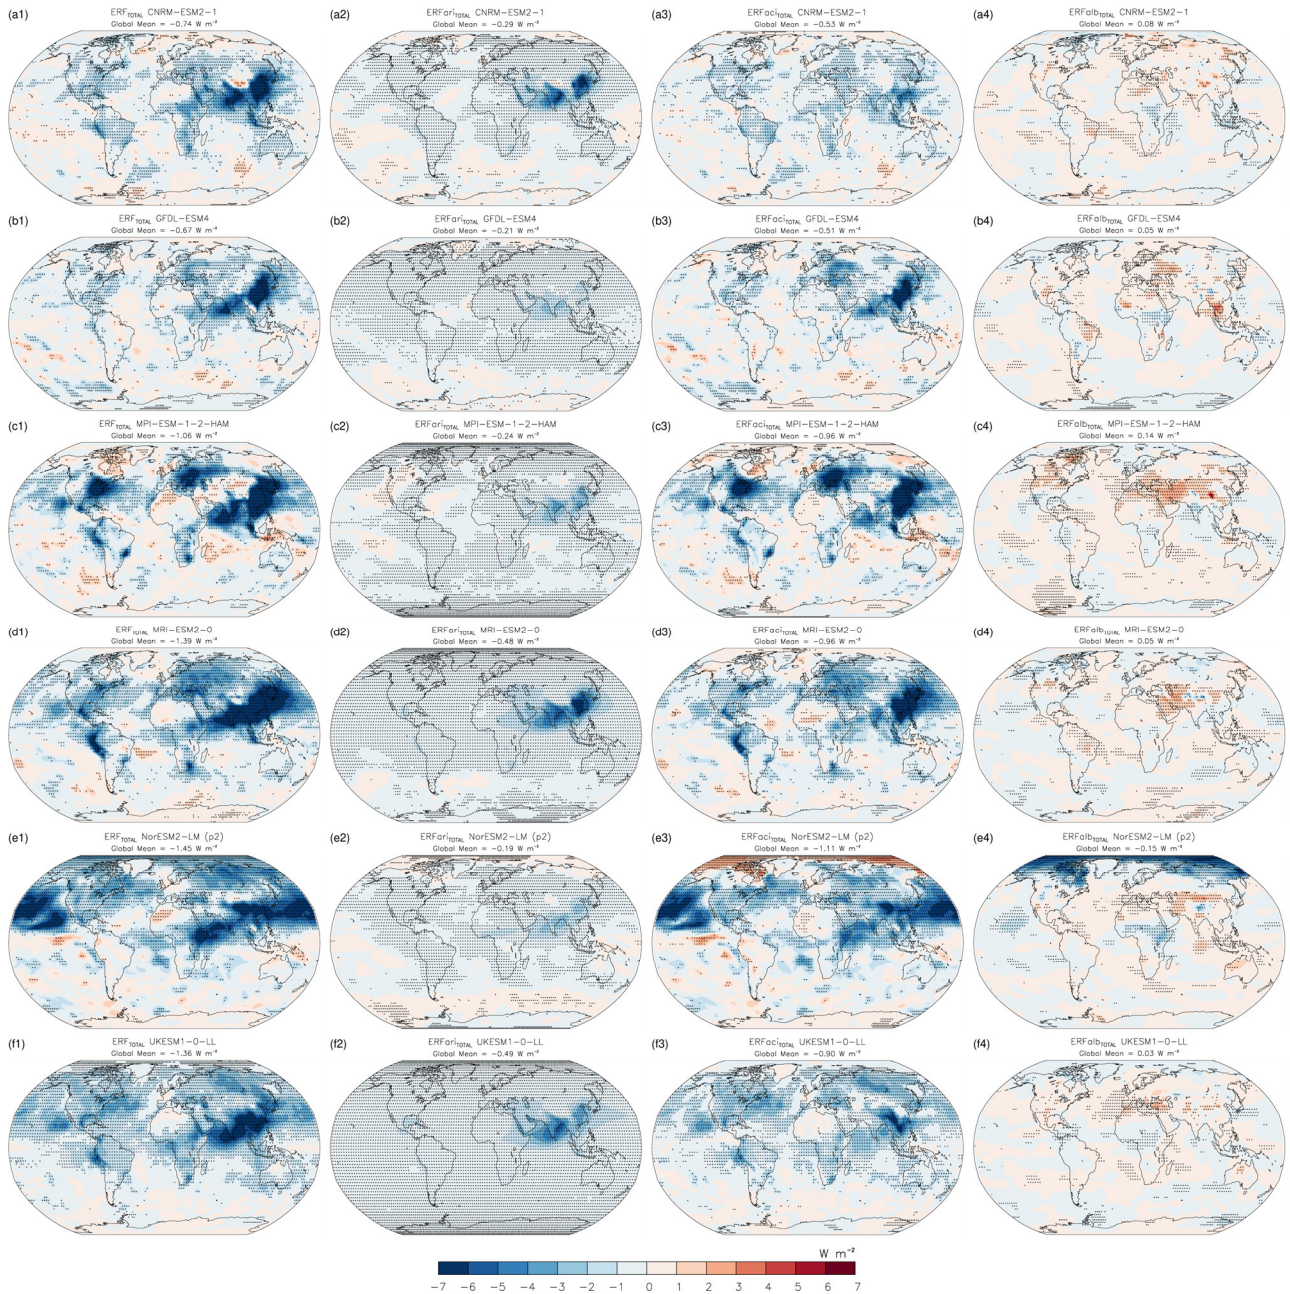

**Figure S7.** The total (SW+LW) ERF due to sulphate aerosols relative to the pre-industrial era for each climate model. The TOA spatial distribution is presented only for the piClim-SO<sub>2</sub> experiment. The global mean total ERF (1<sup>st</sup> column), ERF<sub>ARI</sub> (2<sup>nd</sup> column), ERF<sub>ACI</sub> (3<sup>rd</sup> column), and ERF<sub>ALB</sub> (4<sup>th</sup> column) are shown. Black crosses indicate statistically significant results.

### Organic Carbon Total ERF (piClim-OC - piClim-control)

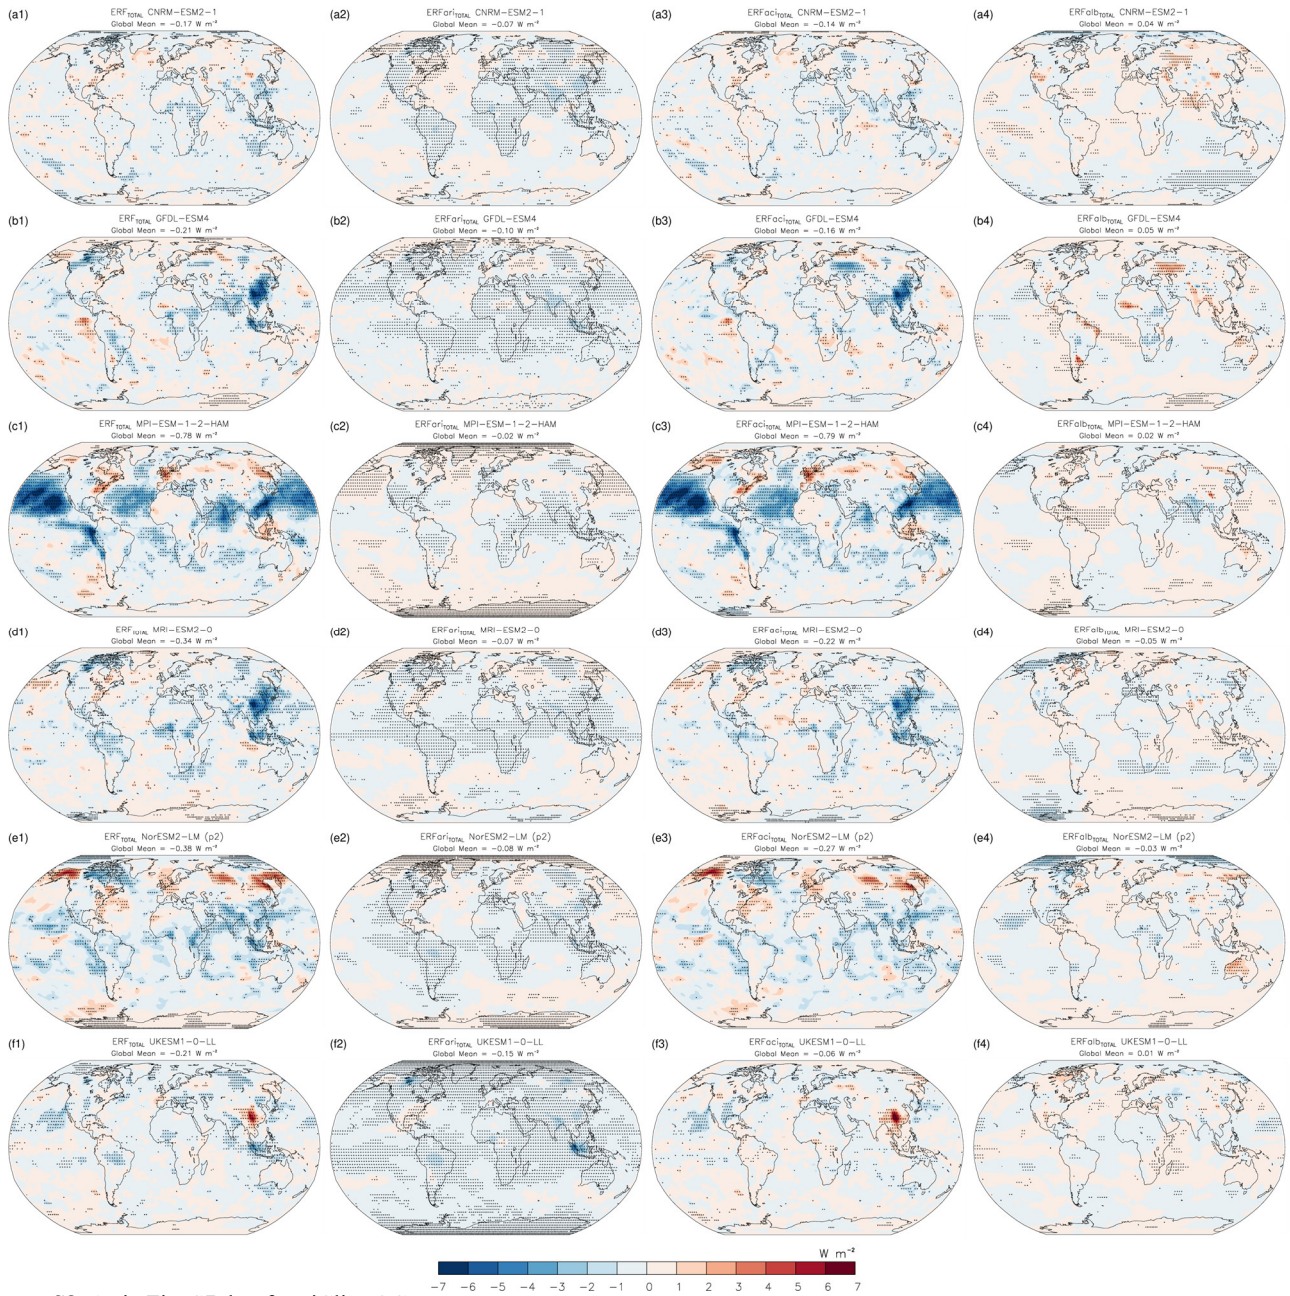

**Figure S8.** As in Fig. S7, but for piClim-OC.

### Black Carbon Total ERF (piClim-BC - piClim-control)

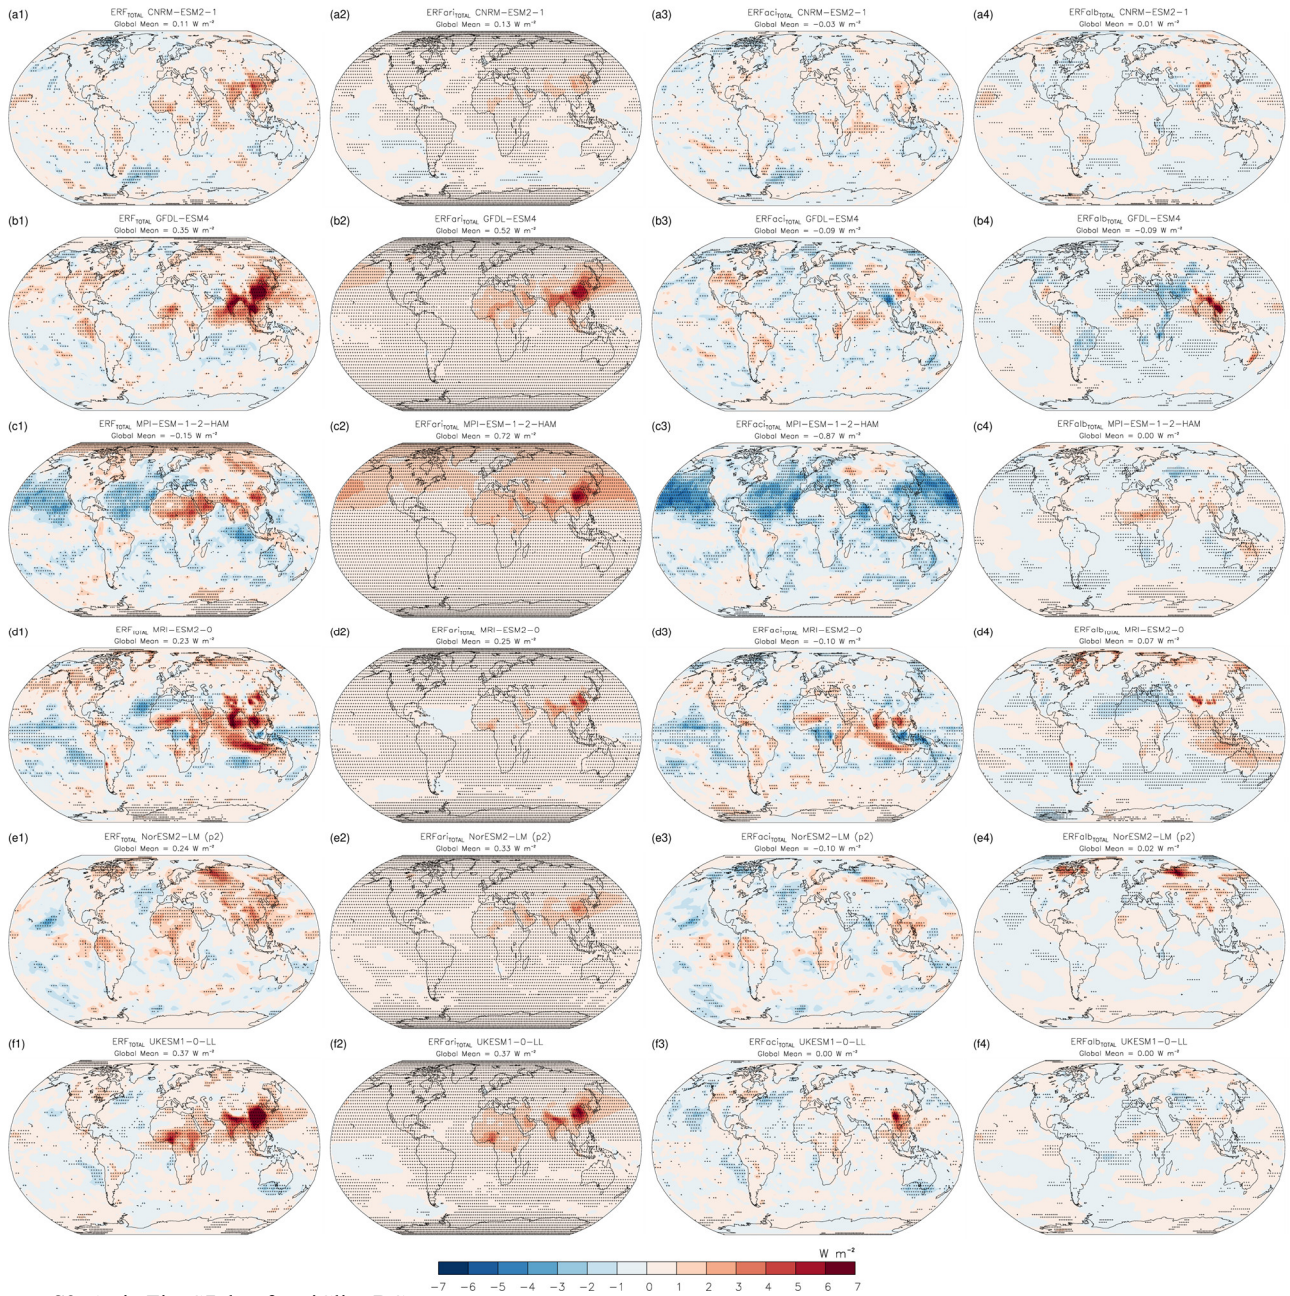

Figure S9. As in Fig. S7, but for piClim-BC.

# ENSEMBLE (histSST - histSST-piAer)

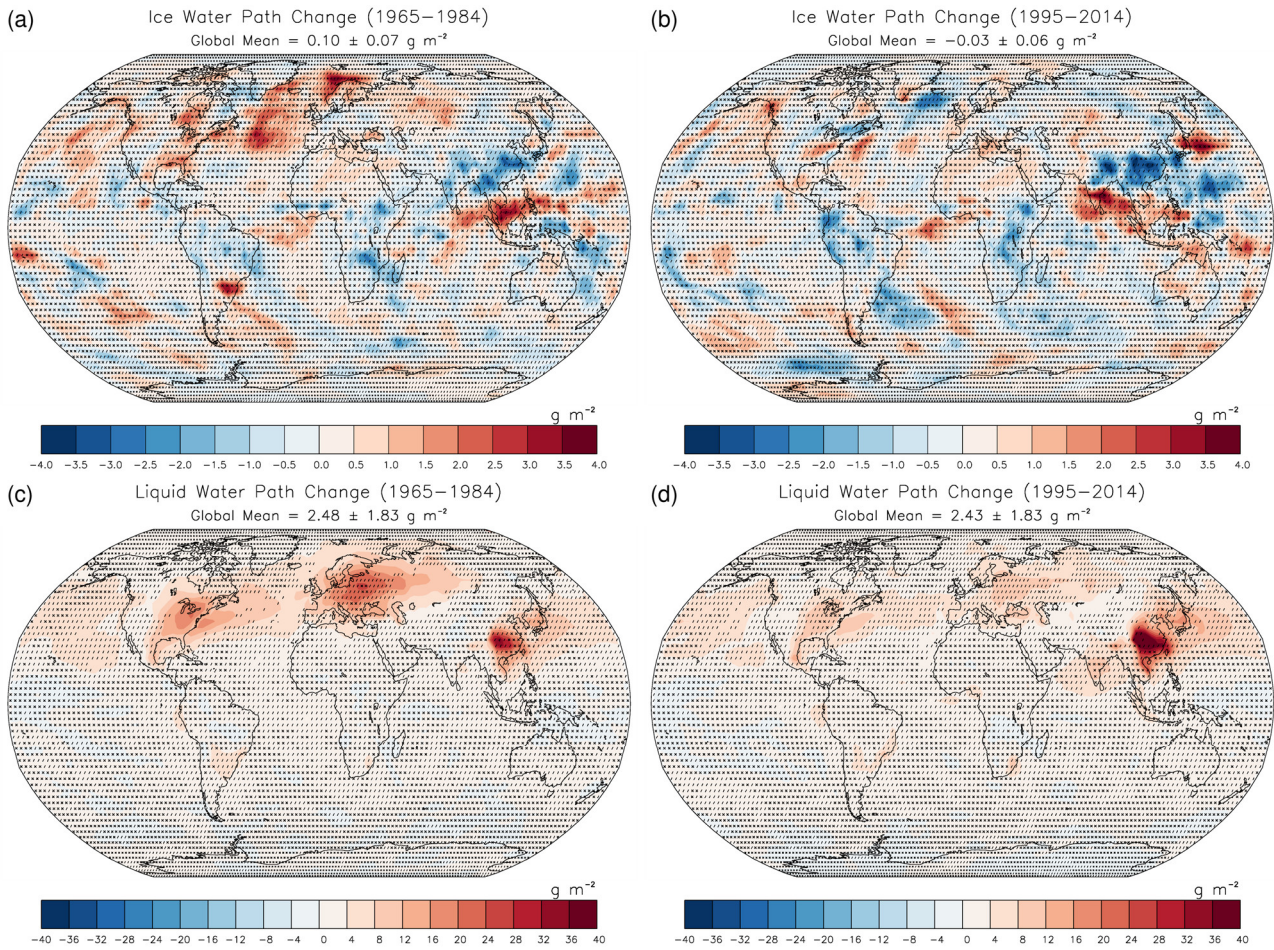

**Figure S10.** Spatial distribution of ice water path changes (top row) and liquid water path changes (bottom row) averaged over 1965-1984 (left column) and 1995-2014 (right column) using the histSST experiment. Global means are shown along with the inter-model variability (one standard deviation). Colored areas devoid of markings indicate robust changes, while hatched (/) and cross-hatched (X) areas indicate non-robust changes and conflicting signals, respectively.
